# Supplementary material for: UNRAVELing the synergistic effects of psilocybin and environment on brain-wide immediate early gene expression in mice
Source: PubMed Central journal article supplement — bioRxiv. 2023 Feb 21:2023.02.19.528997. Preprint. [Version 1] doi: 10.1101/2023.02.19.528997 (PMC9980055; doi:10.1101/2023.02.19.528997), 2023-02-21
Supplement: media-1.pdf [file media-1.pdf]

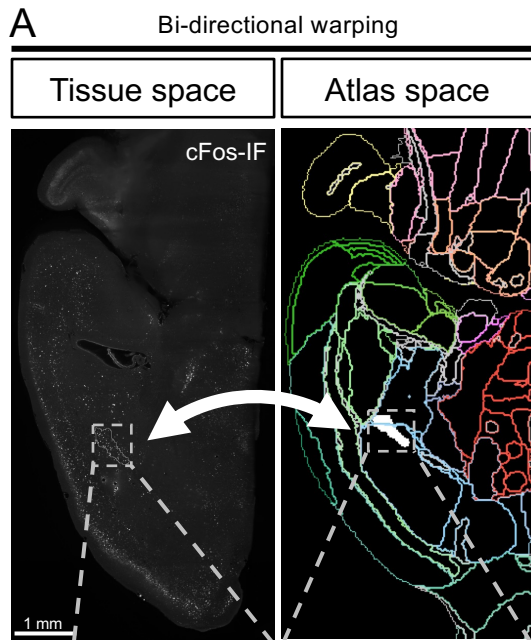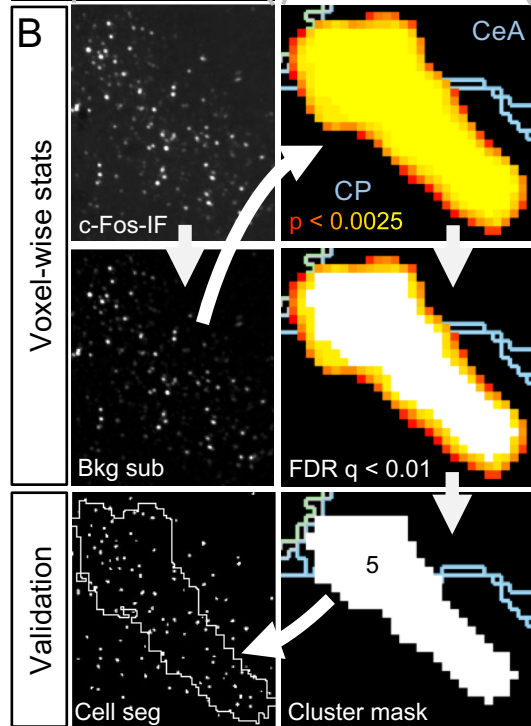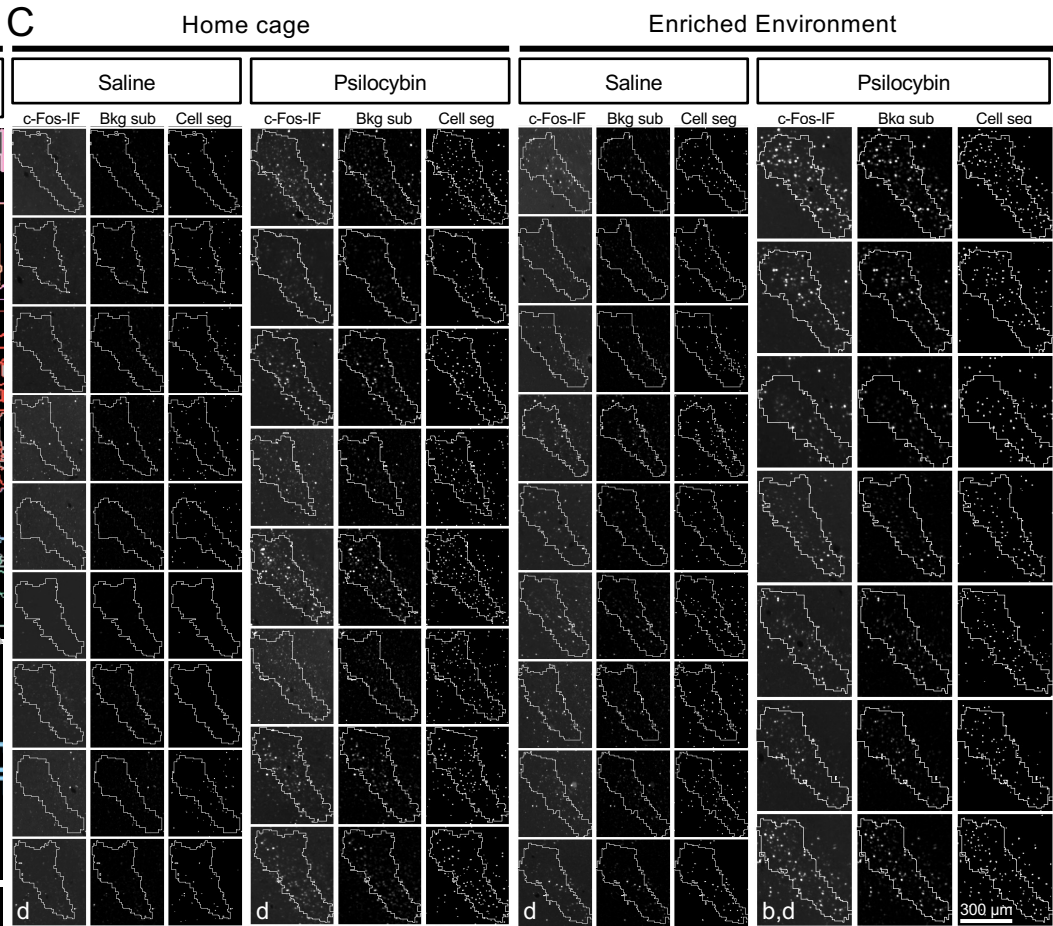

1 **Figure S1: Example data transformations and qualitative validation.** A) Registration of  
2 autofluorescence image volumes to the average template brain and corresponding LSFM  
3 version of the Allen brain atlas (ABA) enabled bidirectional warping between tissue space and  
4 atlas space. B) c-Fos-IF was background subtracted and warped to LSFM atlas space for voxel-  
5 wise analysis. Uncorrected statistical maps were thresholded by FDR correction and cluster  
6 extent to define clusters (white) which were warped to tissue space for quantitative validation via  
7 cluster-specific cell counting and volume measurements. CeA = central amygdala. CP =  
8 caudoputamen. C) Qualitative validation showing montages of raw c-Fos-IF, background  
9 subtracted images (Bkg sub), and consensus cell segmentations (Cell seg). Images represent  
10 the most significant slice for each cluster and condition. The cluster perimeter is shown for each  
11 tile. The row for tile “b” is shown in B. Rows labeled with “d” indicate representative samples  
12 used for D. D) MRlcroGL (1.2.20220720b) 3D visualization of background subtracted and z-  
13 scored ( $z > 3$ ) cFos-IF in clusters with valid psilocybin-mediated activity increases. The  
14 transparent brain is a binary mask of the 25  $\mu\text{m}$  atlas. Select clusters are numerically labeled.

15  
16  
17  
18  
19  
20  
21  
22  
23  
24  
25  
26  
27  
28  
29  
30  
31  
32  
33  
34

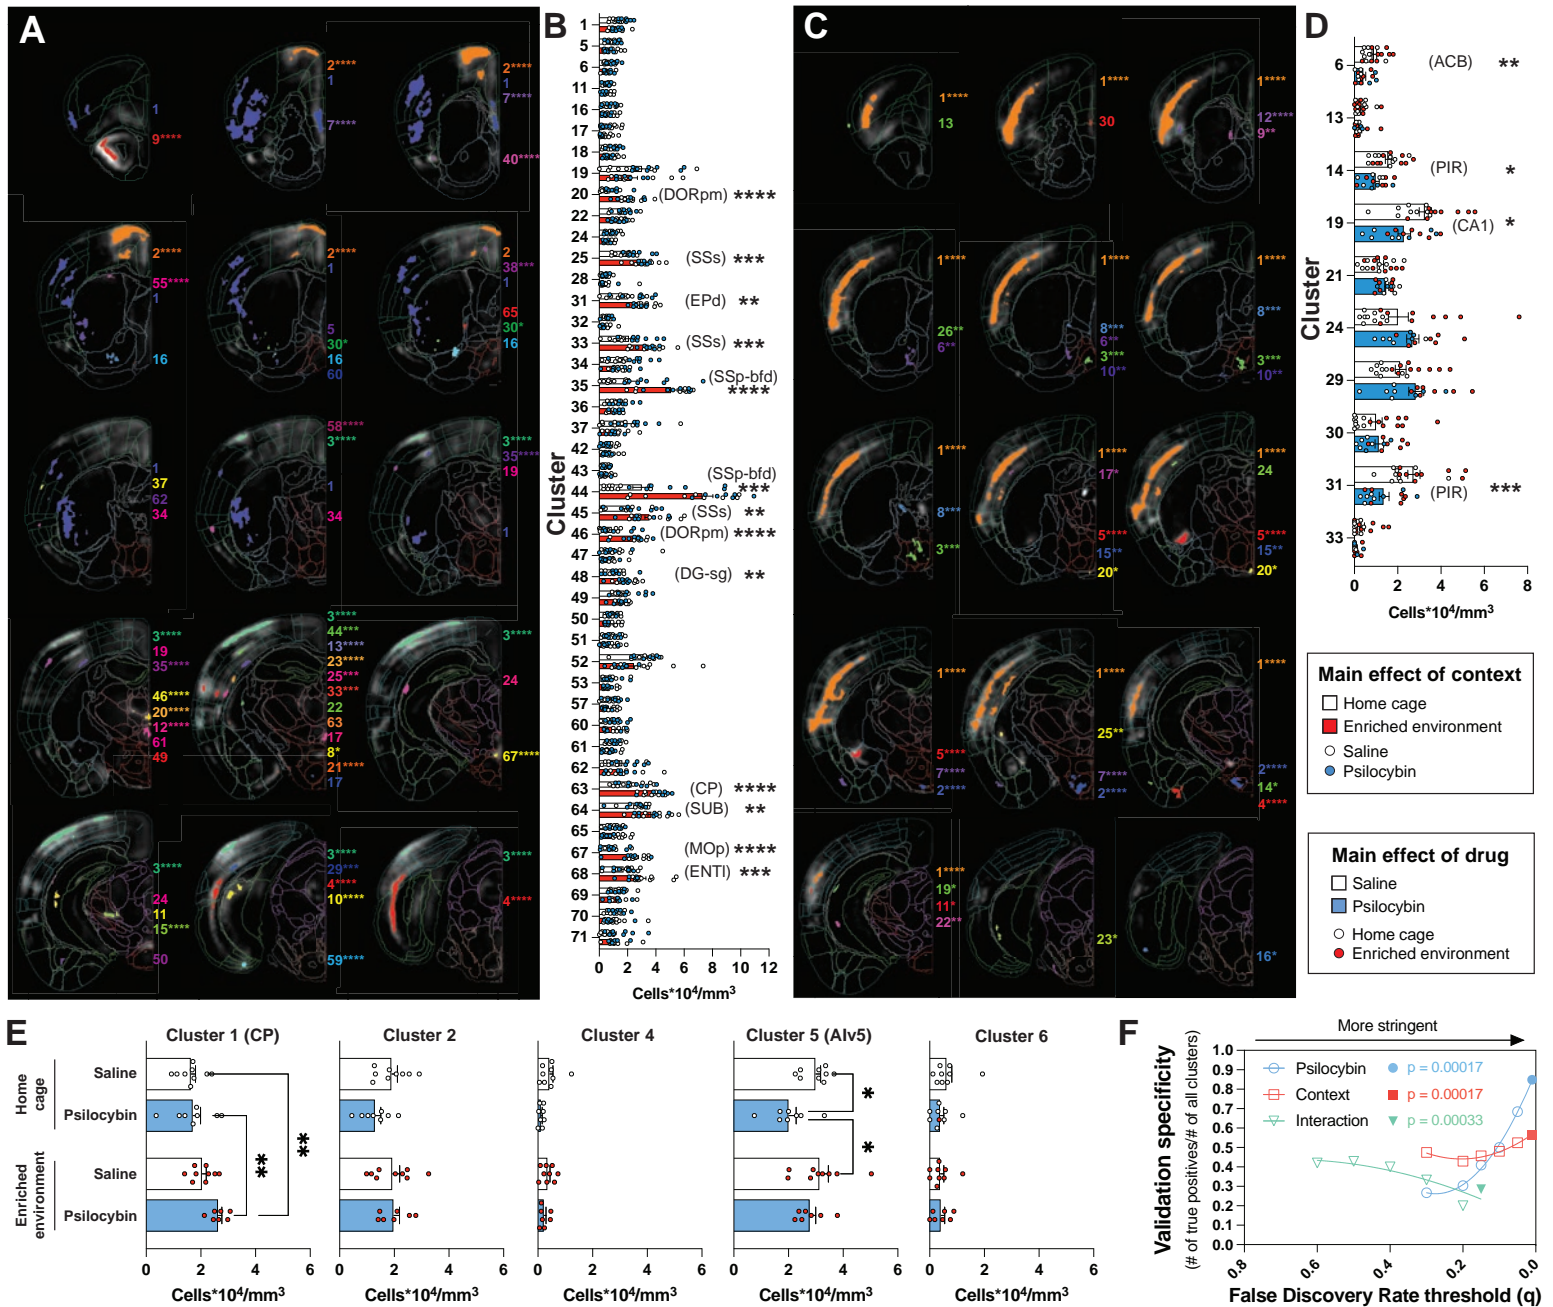

1 **Figure S2: Validation of additional clusters surviving voxel-wise FDR correction**  
2 **(continuation of Figures 2 and 3).** Coronal hemisphere slices illustrating the distribution of  
3 clusters surviving FDR correction ( $q < 0.01$ ) from the main effect of C) context and C)  
4 psilocybin-treatment. Clusters were randomly colored, and the numerical cluster identity (largest  
5 to smallest) is shown along the midline. Clusters overlay a LSFM atlas color coded to Allen atlas  
6 labels atop a smoothed, z-score difference map (EE–home cage; psilocybin–saline) depicting  
7 the average difference in c-Fos-IF intensity (greyscale). Asterisks report significance from *post*  
8 *hoc* analyses shown in B and D as well as in Figure 2C. *Post hoc* unpaired t-tests of c-Fos<sup>+</sup> cell  
9 density in clusters from the main effect of B) context and D) psilocybin. The primary component  
10 region of each valid cluster is shown in parenthesis. E) No *post hoc* 2x2 ANOVA interactions  
11 were observed for interaction clusters shown here. Tukey's *post hoc* comparisons of c-Fos<sup>+</sup> cell  
12 density measurements within each cluster indicate validated differences. F) Validation curve for  
13 statistical contrasts obtained from the voxel-wise 2x2 ANOVA. Results were FDR corrected  
14 across a range of cluster-defining correction thresholds ( $q$ ) and the corresponding rate of true  
15 positives for each set of clusters was determined via cell density measurements and *post hoc*  
16 unpaired t-tests. Solid data points, corresponding to the most stringent adjusted p value cut off,  
17 represent data presented in this paper. ACB = nucleus accumbens; CA1 = field CA1 ; DG-sg =  
18 dentate gyrus, granule cell layer; DORpm = thalamus, polymodal association cortex related;  
19 ENTI = entorhinal area, lateral part; EPd = endopiriform nucleus, dorsal part; MOp = primary  
20 motor area; p-bfd = primary barrel field; PIR = piriform area; PVR = periventricular region; s =  
21 supplemental; SCH = suprachiasmatic nucleus; SS = somatosensory area; SUB = subiculum.  
22 \* $p < 0.05$ , \*\*  $p < 0.01$ , \*\*\* $p < 0.001$ , \*\*\*\* $p < 0.001$ .

23  
24  
25  
26  
27  
28  
29  
30  
31  
32  
33  
34  
35  
36  
37

1 **Table S1: Valid cluster volumes, locations, and regional composition.** Asterisks indicate  
2 significance from *post hoc* unpaired t-tests for main effect clusters in Figure 2 and Figure S2 as  
3 well as significance of interactions from *post hoc* 2x2 ANOVAs in Figure 3. For each cluster,  
4 grouped by anatomical hierarchy and the effect direction determined by *post hoc* tests, the top 4  
5 subregions are shown (subregions collapsed into parent regions as needed). Total cluster  
6 volume is presented as mm<sup>3</sup>. The center of gravity (CoG) is presented as x,y,z coordinates in  
7 the LSFM version of the Allen brain atlas (ABA) used in this paper. Percentages represent the  
8 proportion of total cluster volume a brain region occupies. Cells are color coded to region-  
9 specific RGB values from the ABA. Ventricles, white matter, the olfactory bulb, medulla, and  
10 cerebellum were excluded. a = anterior; bfd = barrel field; d = dorsal; mo = molecular layer; p =  
11 primary; l = lateral; ll = lower limb; s = secondary; v = ventral; sg = granular cell layer; po =  
12 polymorph layer; white text = other. \**p* < 0.05, \*\* *p* < 0.01, \*\*\**p* < 0.001, \*\*\*\**p* < 0.001.

13  
14  
15  
16  
17  
18  
19  
20  
21  
22  
23  
24  
25  
26  
27  
28  
29  
30  
31  
32  
33

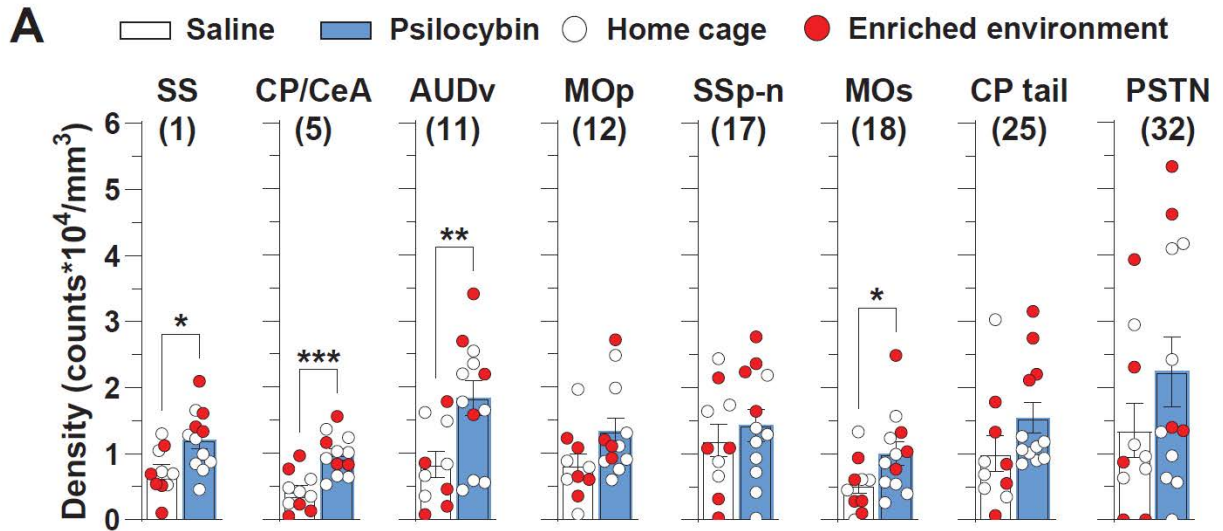

1  
2 **Figure S3: Confirmation of genetic access to ensembles activated by psilocybin (related**  
3 **to Figure 1).** Cluster numbers and the primary component brain region are shown above each  
4 graph. \* $p < 0.05$ , \*\*  $p < 0.01$ , \*\*\* $p < 0.001$ .

5  
6  
7  
8  
9  
10  
11  
12  
13  
14  
15  
16  
17  
18  
19  
20  
21

1 **Table S2: Cluster validation summary (related to Figures 2, 3, and S2).** This Excel file  
2 summarizes cell densities for all clusters and contrasts, sample sizes, p values from *post hoc*  
3 comparisons.

4

5

6

7

8

9

10

11

12

13

14

15

16

17

18

19

20

21

22

23

24

25

26

27

28

29

30

- 1 **Video S1. 3D view of valid clusters from main effects ( $q < 0.01$ ) and interactions ( $q < 0.15$ )**
- 2 **colored based on the ABA (related to Figures 2, 3, and S2).**
